# Supplementary material for: Highly efficient fluorescence sensing of phosphate by dual-emissive lanthanide MOFs
Source: Royal Society of Chemistry journal article supplement (doi:10.1039/c8dt01515e), 2018-01-01
Supplement: c8dt01515e1.pdf [file c8dt01515e1.pdf]

# Supporting Information

## **Highly efficient fluorescence sensing of phosphate by dual-emissive lanthanide MOFs**

Yue Cheng, Huimin Zhang, Bin Yang, Jie Wu, Yixiao Wang, Bin Ding\*, Jianzhong Huo and Yan Li\*

*Key Laboratory of Inorganic-Organic Hybrid Functional Material Chemistry (Tianjin Normal University), Ministry of Education, Tianjin Key Laboratory of Structure and Performance for Functional Molecule, College of Chemistry, Tianjin Normal University, 393 Binshui West Road, Tianjin 300387, PR China.*

\* E-mail: nkliyan398@gmail.com (Y. Li), qsdgingbin@hotmail.com (B. Ding)

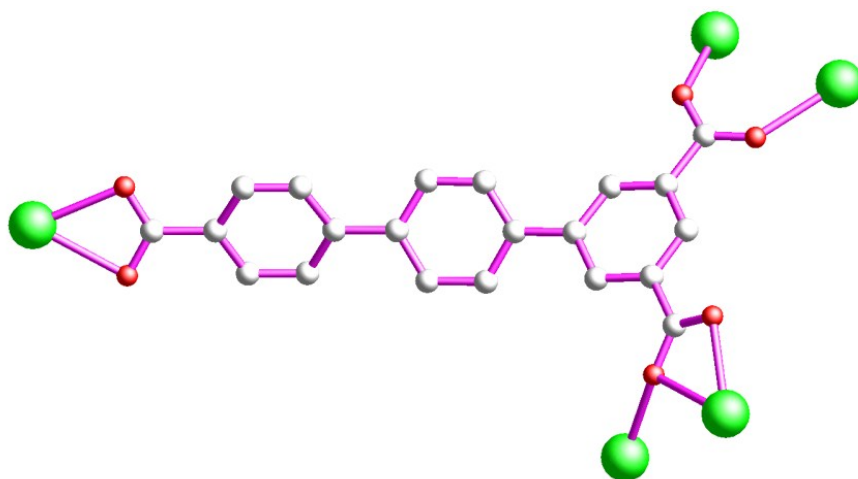

**Scheme S1** The full de-protonated  $L^{3-}$  ligand adopts  $\mu_7-\eta_1, \eta_1, \eta_2, \eta_1, \eta_1$  and  $\eta_1$  coordination mode.

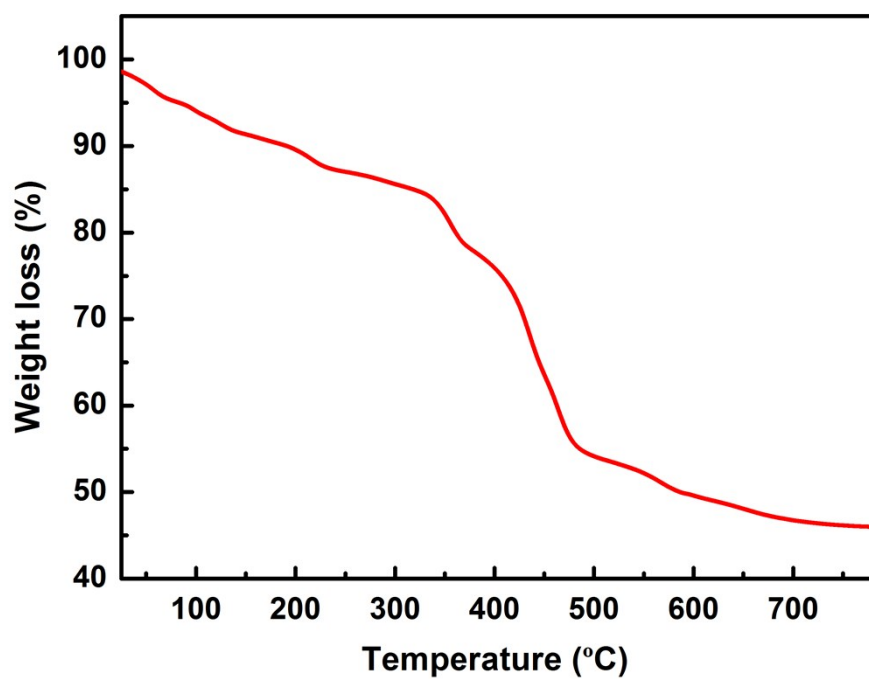

**Fig. S1** TGA profile for the as-synthesized **1**.

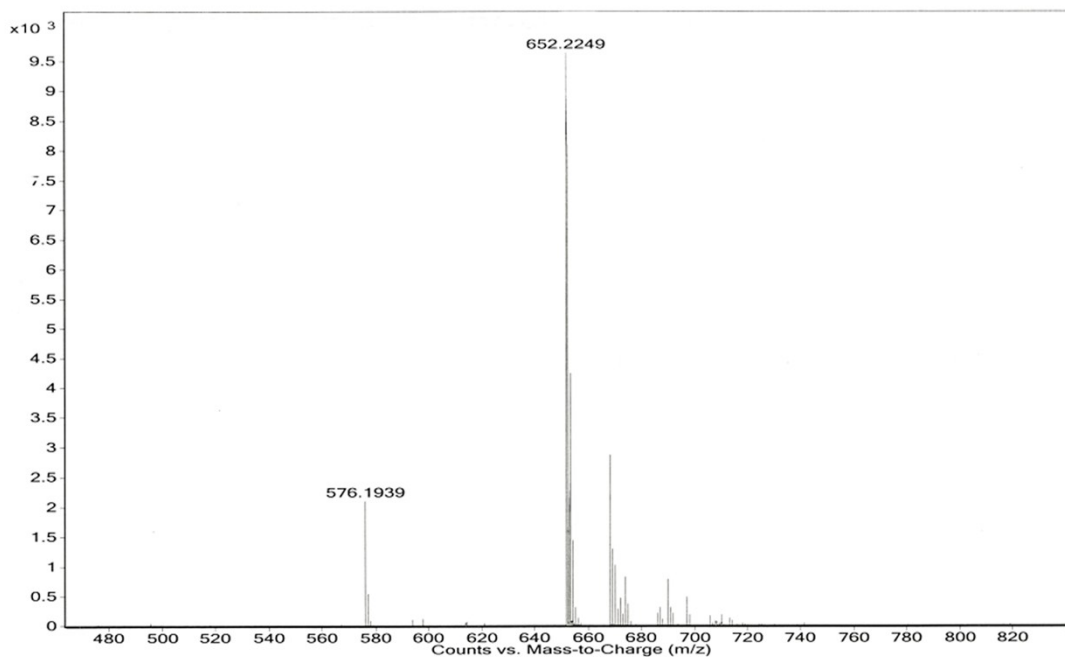

**Fig. S2** High resolution mass spectrum of probe 1.

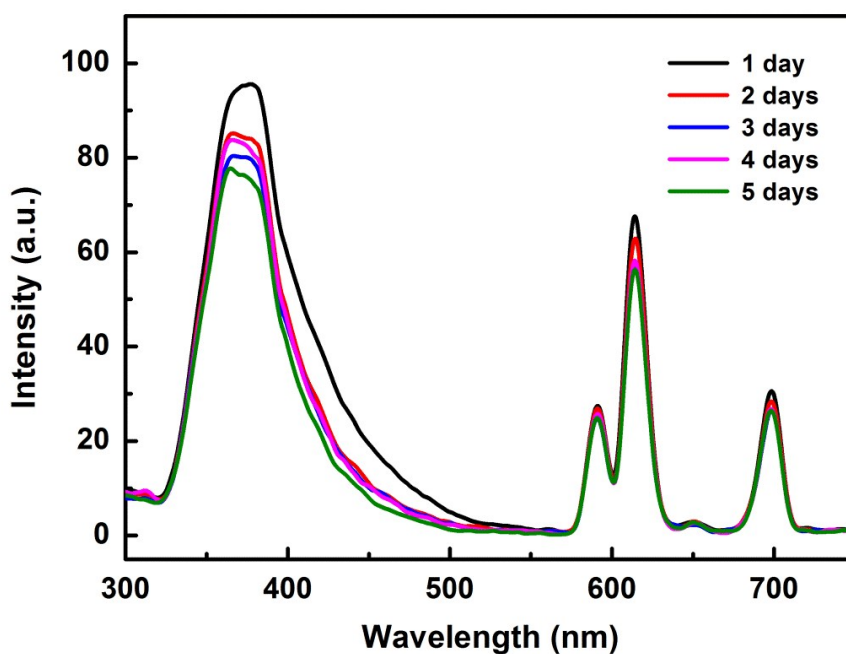

**Fig. S3** Fluorescence emission spectra of **1** dispersed into water solutions as the suspensions within 5 days.

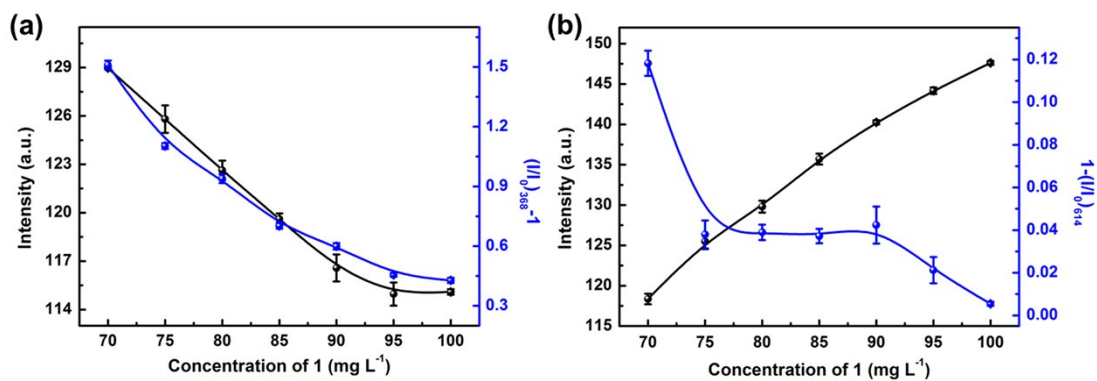

**Fig. S4** (a) The effect of concentration of 1 on the fluorescence intensity and enhancing efficiency after addition of 10 μM Pi. (b) The effect of concentration of 1 on the fluorescence intensity and quenching efficiency after addition of 10 μM Pi.

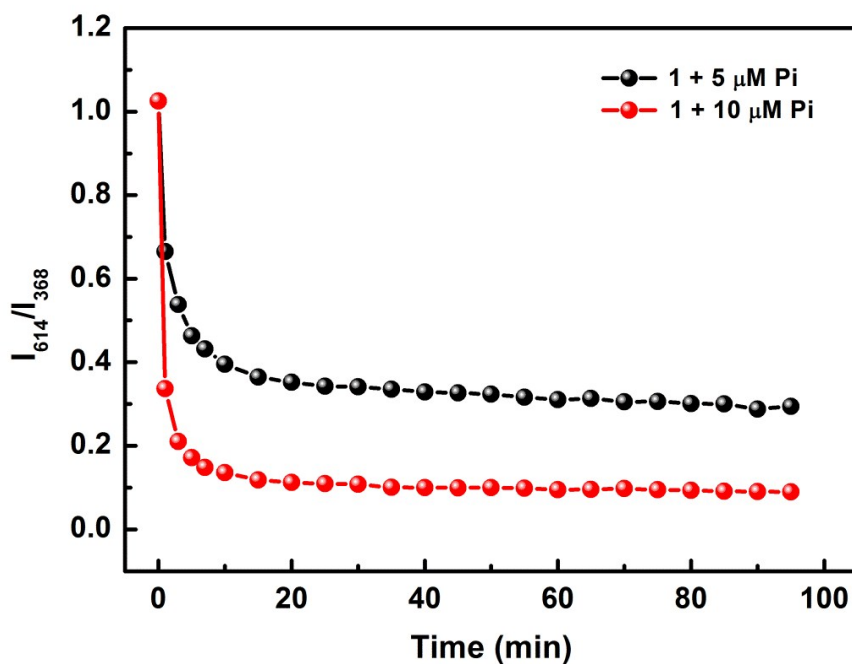

**Fig. S5** Effect of reaction time of 1 on the fluorescence intensity ratio ( $I_{614}/I_{368}$ ) in the presence of 5 μM (black) and 10 μM (red) Pi.

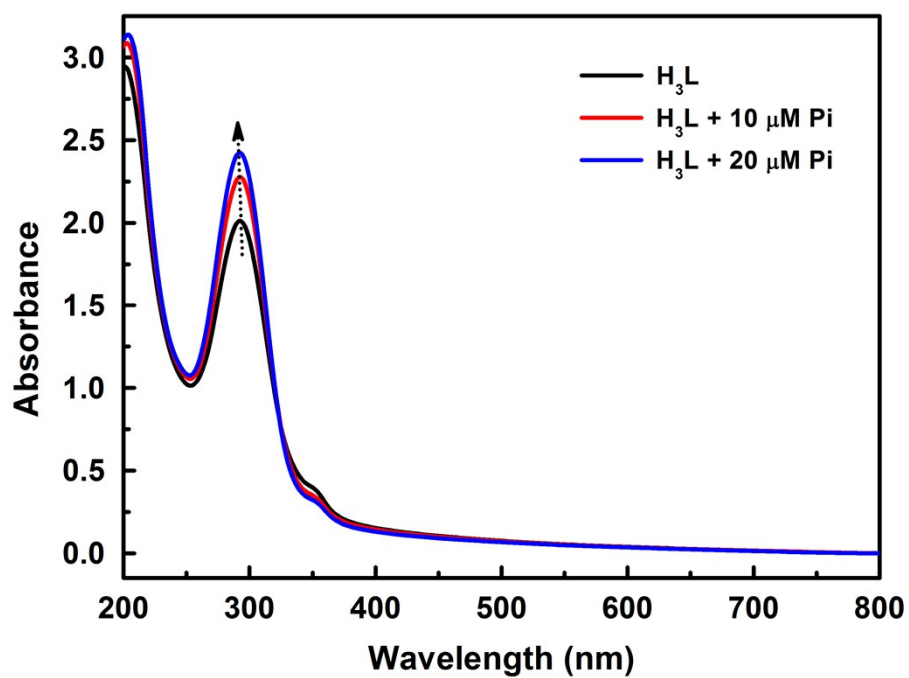

**Fig. S6** UV-vis absorption spectra of free ligand H<sub>3</sub>L and H<sub>3</sub>L in the presence of various concentrations of Pi.

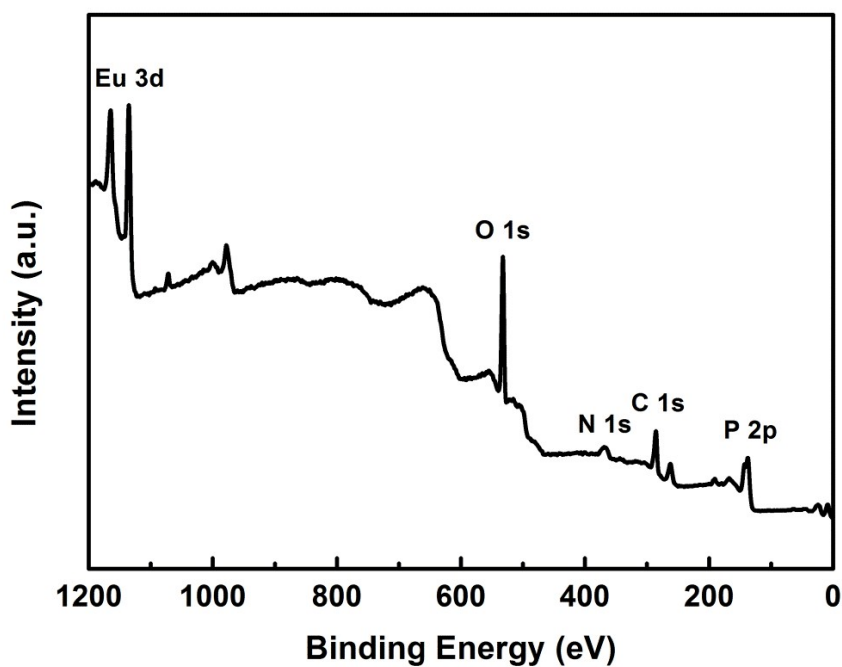

**Fig. S7** Full-scan XPS spectrum of **1** after incubation with Pi.

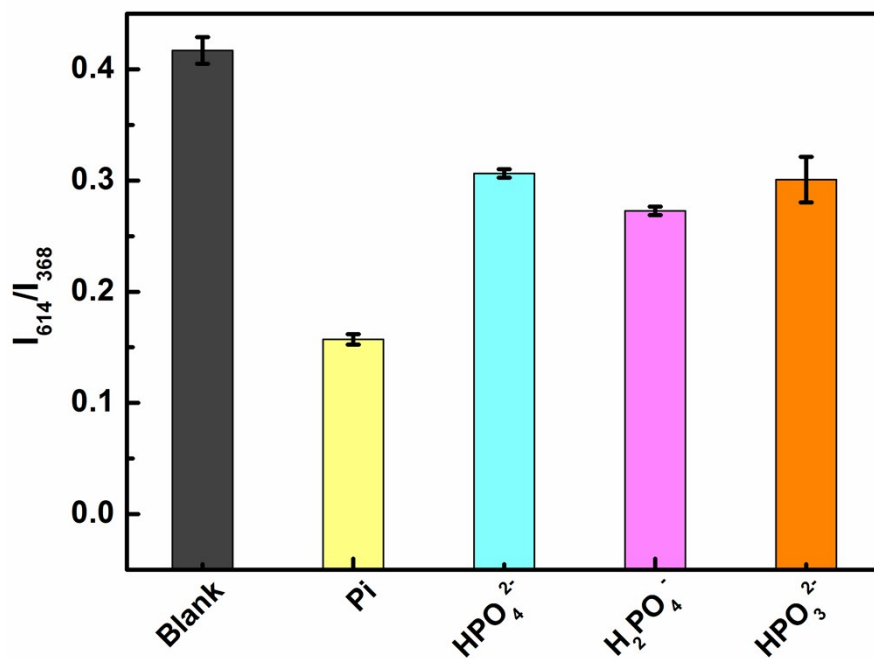

**Fig. S8** Fluorescence intensity ratio ( $I_{614}/I_{368}$ ) of **1** after addition of different phosphorus containing species.

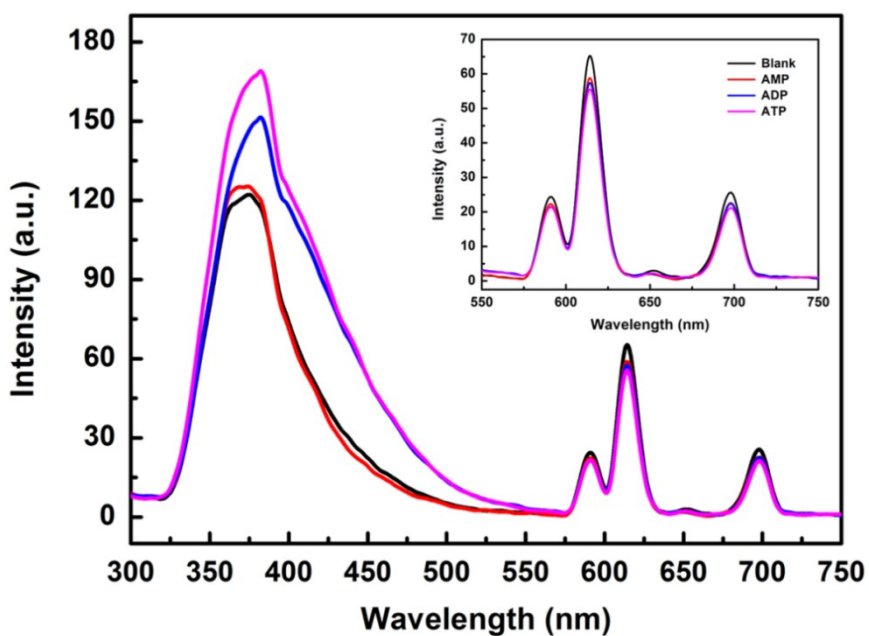

**Fig. S9** Fluorescence emission spectra of **1** with 10  $\mu\text{M}$  of AMP, ADP and ATP nucleoside phosphates added, respectively. Inset: The magnification of fluorescence emission spectra from 550-750 nm.

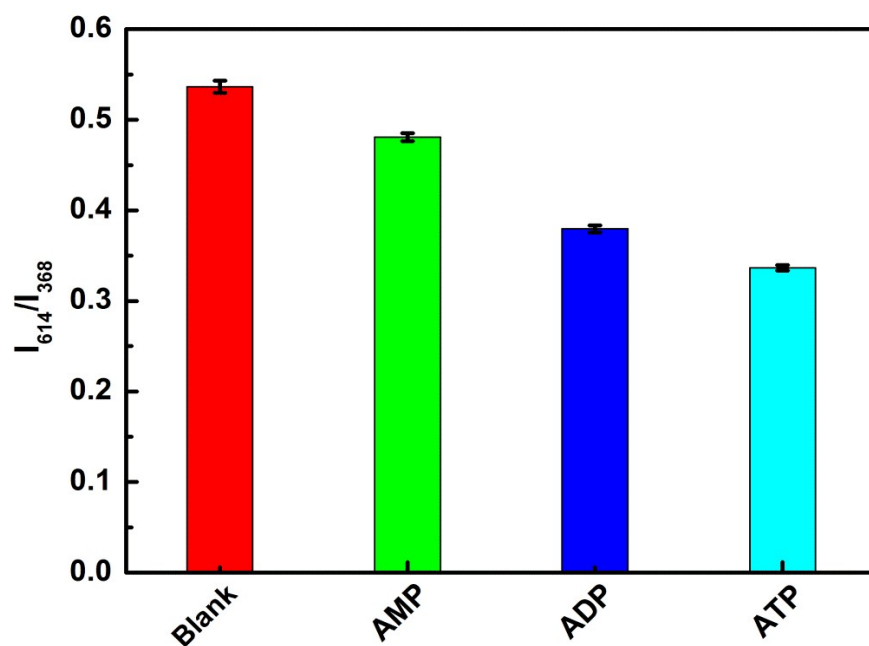

**Fig. S10** Fluorescence intensity ratio ( $I_{614}/I_{368}$ ) of **1** in the presence of 10  $\mu\text{M}$  nucleoside phosphates including AMP, ADP and ATP.

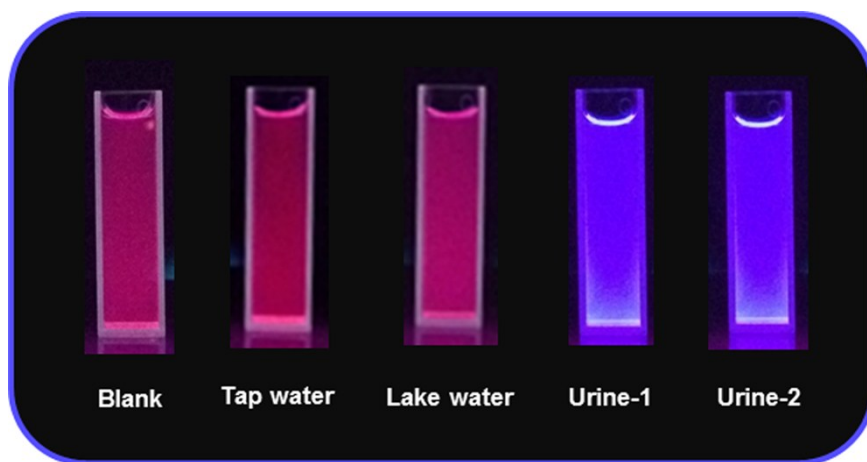

**Fig. S11** Photographs of **1** with the addition of different original (undiluted) real samples under 302 nm UV light irradiation.

**Table S1** Crystallographic data and details of refinements for **1**.<sup>a,b</sup>

| Complex                                                                                          | <b>1</b>                                                                                                           |
|--------------------------------------------------------------------------------------------------|--------------------------------------------------------------------------------------------------------------------|
| Empirical formula                                                                                | C <sub>22.95</sub> H <sub>16.25</sub> EuN <sub>0.65</sub> O <sub>8</sub>                                           |
| Formula weight                                                                                   | 581.09                                                                                                             |
| Crystal system                                                                                   | Monoclinic                                                                                                         |
| Space group                                                                                      | C <sub>2</sub> /c                                                                                                  |
| <i>a</i> /Å                                                                                      | 33.0877(8)                                                                                                         |
| <i>b</i> /Å                                                                                      | 13.6008(4)                                                                                                         |
| <i>c</i> /Å                                                                                      | 14.1080(3)                                                                                                         |
| $\alpha$ /°                                                                                      | 90                                                                                                                 |
| $\beta$ /°                                                                                       | 102.249(2)                                                                                                         |
| $\gamma$ /°                                                                                      | 90                                                                                                                 |
| <i>V</i> /Å <sup>3</sup>                                                                         | 6204.3(3)                                                                                                          |
| <i>Z</i>                                                                                         | 8                                                                                                                  |
| <i>D</i> /g·cm <sup>-3</sup>                                                                     | 1.231                                                                                                              |
| $\mu$ /mm <sup>-1</sup>                                                                          | 14.779                                                                                                             |
| <i>F</i> (000)                                                                                   | 2300                                                                                                               |
| Crystal size /mm <sup>3</sup>                                                                    | 0.25 × 0.22 × 0.20                                                                                                 |
| $\theta$ range for data collection /°                                                            | 9.136 - 147.26                                                                                                     |
| Limiting indices                                                                                 | -31 ≤ <i>h</i> ≤ 40,<br>-13 ≤ <i>k</i> ≤ 13,<br>-14 ≤ <i>l</i> ≤ 17,<br>-16 ≤ <i>k</i> ≤ 9,<br>-17 ≤ <i>l</i> ≤ 15 |
| Reflections collected / unique ( <i>R</i> <sub>int</sub> )<br>unique ( <i>R</i> <sub>int</sub> ) | 12348 / 6102(0.0343)                                                                                               |
| Completeness                                                                                     | 97.5%                                                                                                              |
| Max. and min. transmission                                                                       | 0.062 and 0.052                                                                                                    |
| Data / restraints / parameters                                                                   | 6102 / 82 / 312                                                                                                    |
| Goodness-of-fit on <i>F</i> <sup>2</sup>                                                         | 1.043                                                                                                              |
| Final <i>R</i> indices [ <i>I</i> > 2σ( <i>I</i> )]                                              | <i>R</i> <sub>1</sub> = 0.0399, <i>wR</i> <sub>2</sub> = 0.1019                                                    |
| <i>R</i> indices (all data)                                                                      | <i>R</i> <sub>1</sub> = 0.0472, <i>wR</i> <sub>2</sub> = 0.1081<br><i>wR</i> <sub>2</sub> = 0.2069                 |
| Largest diff. peak and hole /e·Å <sup>-3</sup>                                                   | 1.43 / -0.77                                                                                                       |

<sup>a</sup> $R_1 = \sum ||F_o| - |F_c|| / |F_o|$ . <sup>b</sup> $\omega R_2 = [\sum w(|F_o|^2 - |F_c|^2)^2 / w|F_o|^2]^1/2$ .



**Table S2** Selected bond lengths /Å and bond angles /° for complex **1**.

|                    |            |                    |            |
|--------------------|------------|--------------------|------------|
| Eu(1)-O(1)         | 2.393(3)   | Eu(1)-O(3)         | 2.447(3)   |
| Eu(1)-O(4)         | 2.368(3)   | Eu(1)-O(7)         | 2.461(4)   |
| Eu(1)-O(2)         | 2.388(3)   | Eu(1)-O(5)         | 2.531(3)   |
| Eu(1)-O(6)         | 2.435(3)   | Eu(1)-O(7)         | 2.461(4)   |
| O(1)- Eu (1) -O(3) | 72.78(12)  | O(1)- Eu (1) -O(4) | 68.85(9)   |
| O(1)- Eu (1) -O(5) | 70.65(11)  | O(1)- Eu (1) -O(6) | 80.19(12)  |
| O(1)- Eu (1) -O(7) | 137.54(14) | O(3)- Eu (1) -O(8) | 135.5(2)   |
| O(2)- Eu (1) -O(3) | 91.58(11)  | O(2)- Eu (1) -O(4) | 67.86(9)   |
| O(2)- Eu (1) -O(5) | 142.70(11) | O(2)- Eu (1) -O(6) | 142.01(13) |
| O(2)- Eu (1) -O(7) | 71.48(12)  | O(2)- Eu (1) -O(8) | 75.9(2)    |
| O(3)- Eu (1) -O(4) | 50.53(9)   | O(3)- Eu (1) -O(5) | 125.36(10) |
| O(3)- Eu (1) -O(7) | 73.24(15)  | O(3)- Eu (1) -O(8) | 143.5(6)   |
| O(4)- Eu (1) -O(5) | 82.65(10)  | O(4)- Eu (1) -O(6) | 133.78(11) |
| O(4)- Eu (1) -O(7) | 147.06(12) | O(4)- Eu (1) -O(8) | 81.9(4)    |
| O(5)- Eu (1) -O(6) | 52.32(11)  | O(6)- Eu (1) -O(7) | 70.91(13)  |
| O(6)- Eu (1) -O(8) | 91.6(7)    | O(7)- Eu (1) -O(8) | 76.0(4)    |

**Table S3** Comparison of various methods for the determination of Pi.

| Analytic methods                          | Systems                                                                                                                         | Linear range ( $\mu\text{M}$ ) | Detection limit ( $\mu\text{M}$ ) | Ref.      |
|-------------------------------------------|---------------------------------------------------------------------------------------------------------------------------------|--------------------------------|-----------------------------------|-----------|
| Colorimetric method                       | MA-AuNPs                                                                                                                        | 0.5-30                         | 0.076                             | [1]       |
| Colorimetric method                       | $\text{Fe}_3\text{O}_4$ MNPs-TMB- $\text{H}_2\text{O}_2$                                                                        | 0.2-200                        | 0.11                              | [2]       |
| Electrochemical method                    | Al-Cu/Si-p/SiO <sub>2</sub> /Si <sub>3</sub> N <sub>4</sub> / Cu(II)Pc-PAA                                                      | 0.0001-1                       | 0.001                             | [3]       |
| Electrochemical method                    | Three-electrode                                                                                                                 | 1-20                           | 0.3                               | [4]       |
| Electrochemical method                    | Ni-BPE                                                                                                                          | 40-1000                        | 0.3                               | [5]       |
| Fluorescent method<br>Signal <sup>a</sup> | ZnO QDs-MOF-5<br>Fluorescence enhancing                                                                                         | 0.5-12                         | 0.053                             | [6]       |
| Fluorescent method<br>Signal              | UiO-66-NH <sub>2</sub><br>Fluorescence enhancing                                                                                | 5-150                          | 1.25                              | [7]       |
| Fluorescent method<br>Signal              | Mn: ZnTe/ZnSe QDs<br>Fluorescence quenching                                                                                     | 0.67-50                        | 0.2                               | [8]       |
| Fluorescent method<br>Signal              | {[EuL(H <sub>2</sub> O) <sub>1.35</sub> (DMF) <sub>0.65</sub> ] $\cdot$ 1.9DMF} <sub>n</sub> ( <b>1</b> )<br>Ratio fluorescence | 0.1-15                         | 0.052                             | This work |

<sup>a</sup>Fluorescence signal changing mode.

**Table S4** Analytical results (mean  $\pm$   $\sigma$ , n=3) for the detection of Pi in real samples.

| Samples              | Spiked ( $\mu\text{M}$ ) | Measured ( $\mu\text{M}$ ) | Recovery (%) | R.S.D. (n=3, %) |
|----------------------|--------------------------|----------------------------|--------------|-----------------|
| Tap water            | 0                        | $3.83 \pm 0.35$            |              |                 |
|                      | 5                        | $8.86 \pm 0.04$            | 100.6        | 1.7             |
| Lake water           | 0                        | $9.91 \pm 0.01$            |              |                 |
|                      | 5                        | $14.55 \pm 0.03$           | 92.8         | 2.3             |
| Urine-1 <sup>a</sup> | 0                        | $10.06 \pm 0.01$           |              |                 |
|                      | 5                        | $14.95 \pm 0.13$           | 97.8         | 4.3             |
| Urine-2 <sup>a</sup> | 0                        | $5.28 \pm 0.01$            |              |                 |
|                      | 5                        | $10.25 \pm 0.06$           | 99.4         | 1.4             |

<sup>a</sup>Diluted urine sample.

## Notes and references

- 1 W. Q. Liu, Z. F. Du, Y. Qian and F. Li, *Sens. Actuators, B*, 2013, **176**, 927-931.
- 2 C. X. Chen, L. X. Lu, Y. Zheng, D. Zhao, F. Yang and X. R. Yang, *Anal. Methods*, 2015, **7**, 161-167.
- 3 L. Barhoumi, A. Baraket, N. M. Nooredeen, M. B. Ali, M. N. Abbas, J. Bausells and A. Errachid, *Electroanal.*, 2017, **29**, 1586-1595.
- 4 J. C. Quintana, L. Idrissi, G. Palleschi, P. Albertano, A. Amine, M. El Rhazi and D. Moscone, *Talanta*, 2004, **63**, 567-574.
- 5 W. L. Cheng, J. W. Sue, W. C. Chen, J. L. Chang and J. M. Zen, *Anal. Chem.*, 2010, **82**, 1157-1161.
- 6 D. Zhao, X. Y. Wan, H. J. Song, L. Y. Hao, Y. Y. Su and Y. Lv, *Sens. Actuators, B*, 2014, **197**, 50-57.
- 7 J. Yang, Y. Dai, X. Y. Zhu, Z. Wang, Y. S. Li, Q. X. Zhuang, J. L. Shi and J. L. Gu, *J. Mater. Chem. A*, 2015, **3**, 7445-7452.
- 8 Y. Song, Y. Li, Y. L. Liu, X. G. Su and Q. Ma, *Talanta*, 2015, **144**, 680-685.
